# Supplementary material
Source: Research Square preprint supplement (doi:10.21203/rs.3.rs-9604660/v1)
Supplement: Supplementary file 1 [file 846ab616e420b5eeb391d99d.docx]

# Appendices

## Appendix 1: PERMANOVA results for macroinvertebrate prey species variance across sites

| Predictor | Adjusted_R2 | F | P |
| --- | --- | --- | --- |
| Creek | 0.321 | 5.431 | 0.001 |
| Elevation | 0.165 | 4.757 | 0.001 |
| Recreation | 0.143 | 3.989 | 0.005 |
| Band1 | 0.125 | 3.415 | 0.013 |
| Woody | 0.124 | 3.384 | 0.007 |
| Rural | 0.122 | 3.348 | 0.004 |
| Urban | 0.121 | 3.294 | 0.008 |
| Conserved | 0.103 | 2.751 | 0.020 |

## Appendix 2: Model averaging results for environmental predictor influence on number of macroinvertebrate prey orders

| Predictor | Estimate | Std Error | Z | P |
| --- | --- | --- | --- | --- |
| Intercept | -1.478 | 10.645 | 10.770 | 0.137 |
| Band1 | 0.108 | 0.181 | 0.183 | 0.588 |
| Woody | 0.009 | 0.006 | 0.006 | 1.603 |
| Conserved | -0.002 | 0.001 | 0.001 | 1.616 |
| Urban | 0.004 | 0.003 | 0.003 | 1.556 |
| Rural | 0.001 | 0.002 | 0.002 | 0.332 |
| Elevation | 0.004 | 0.002 | 0.002 | 1.545 |

## Appendix 3: Conditional averaged model coefficients for predicting SIGNAL based on environmental factors

| Variable | Estimate | Std Error | Z | P |
| --- | --- | --- | --- | --- |
| Intercept | 2.378 | 2.146 | 1.095 | 0.273 |
| Band1 | -0.035 | 0.011 | 2.991 | 0.003 |
| Recreation | 0.002 | 0.001 | 2.234 | 0.026 |
| Woody | -0.001 | 0.000 | 3.014 | 0.003 |
| Conserved | 0.000 | 0.000 | 1.963 | 0.050 |
| Elevation | -0.001 | 0.000 | 3.242 | 0.001 |
| Urban | -0.000 | 0.000 | 1.356 | 0.175 |

## Appendix 4: Reference, location, Global Human Modification index (gHM, 25 km buffer), home range, tracking duration, age class, and sex for individual platypuses from ten radio-tracking studies used in the cross-study synthesis

| Reference | State | River | Lat | Lon | gHM (25 km) | gHM Epoch | Home Range (m) | Duration (d) | Age | Sex | Coord source |
| --- | --- | --- | --- | --- | --- | --- | --- | --- | --- | --- | --- |
| Boulton et al., 2025 | VIC | Coranderrk Creek | -37.68 | 145.53 | 0.176 | 2020 | 604 | 60 | Adult | F | Tier 1 |
|  |  |  | -37.68 | 145.53 | 0.176 | 2020 | 822 | 75 | Adult | F | Tier 1 |
|  |  |  | -37.68 | 145.53 | 0.176 | 2020 | 1331 | 79 | Adult | F | Tier 1 |
| Crane et al., 2022 | VIC | Mitta Mitta River | -36.48 | 148.79 | 0.103 | 2020 | 2016 | 58 | Adult | F | Tier 1 |
|  |  |  | -36.48 | 148.78 | 0.102 | 2020 | 1745 | 67 | Adult | F | Tier 1 |
|  |  |  | -36.48 | 148.78 | 0.102 | 2020 | 814 | 69 | Adult | F | Tier 1 |
|  |  |  | -36.48 | 148.78 | 0.102 | 2020 | 746 | 71 | Adult | F | Tier 1 |
|  |  |  | -36.48 | 148.78 | 0.102 | 2020 | 505 | 75 | Adult | F | Tier 1 |
|  |  |  | -36.48 | 148.78 | 0.101 | 2020 | 1373 | 70 | Adult | F | Tier 1 |
|  |  |  | -36.48 | 148.77 | 0.101 | 2020 | 634 | 17 | Adult | F | Tier 1 |
|  |  |  | -36.48 | 148.77 | 0.100 | 2020 | 502 | 41 | Adult | F | Tier 1 |
| Gardner & Serena, 1995 | VIC | Badger Creek | -37.69 | 145.50 | 0.171 | 1995 | 7000 | 69 | Adult | M | Tier 2 |
|  |  |  | -37.66 | 145.49 | 0.157 | 1995 | 1300 | 116 | Adult | M | Tier 2 |
|  |  |  | -37.65 | 145.52 | 0.140 | 1995 | 2900 | 79 | Adult | M | Tier 2 |
|  |  |  | -37.65 | 145.52 | 0.140 | 1995 | 3300 | 68 | Adult | M | Tier 2 |
|  |  |  | -37.64 | 145.54 | 0.129 | 1995 | 4100 | 116 | Adult | M | Tier 2 |
| Grant et al., 1992 | NSW | Thredbo River | -36.44 | 148.44 | 0.035 | 1990 | 410 | 2 | Adult | M | Tier 2 |
|  |  |  | -36.44 | 148.44 | 0.035 | 1990 | 1290 | 2 | Adult | M | Tier 2 |
|  |  |  | -36.44 | 148.44 | 0.035 | 1990 | 1670 | 58 | Adult | M | Tier 2 |
|  |  |  | -36.44 | 148.44 | 0.035 | 1990 | 1670 | 21 | Adult | M | Tier 2 |
|  |  |  | -36.44 | 148.44 | 0.035 | 1990 | 2300 | 148 | Adult | M | Tier 2 |
|  |  |  | -36.44 | 148.44 | 0.035 | 1990 | 560 | 33 | Adult | F | Tier 2 |
|  |  |  | -36.44 | 148.44 | 0.035 | 1990 | 560 | 1 | Adult | F | Tier 2 |
|  |  |  | -36.44 | 148.44 | 0.035 | 1990 | 370 | 135 | Adult | F | Tier 2 |
| Gust & Handasyde, 1995 | VIC | Hughes Creek | -37.25 | 145.75 | 0.106 | 1995 | 350 | 36 | Adult | M | Tier 2 |
|  |  |  | -37.25 | 145.75 | 0.106 | 1995 | 450 | 46 | Adult | M | Tier 2 |
|  |  |  | -37.25 | 145.75 | 0.106 | 1995 | 450 | 43 | Adult | M | Tier 2 |
|  |  |  | -37.25 | 145.75 | 0.106 | 1995 | 475 | 46 | Adult | M | Tier 2 |
|  |  |  | -37.25 | 145.75 | 0.106 | 1995 | 500 | 46 | Adult | M | Tier 2 |
|  |  |  | -37.25 | 145.75 | 0.106 | 1995 | 500 | 43 | Adult | M | Tier 2 |
|  |  |  | -37.25 | 145.75 | 0.106 | 1995 | 955 | 43 | Adult | M | Tier 2 |
|  |  |  | -37.25 | 145.75 | 0.106 | 1995 | 1275 | 46 | Adult | M | Tier 2 |
|  |  |  | -37.25 | 145.75 | 0.106 | 1995 | 1350 | 36 | Adult | M | Tier 2 |
|  |  |  | -37.25 | 145.75 | 0.106 | 1995 | 1400 | 36 | Adult | M | Tier 2 |
|  |  |  | -37.25 | 145.75 | 0.106 | 1995 | 1875 | 43 | Adult | M | Tier 2 |
|  |  |  | -37.25 | 145.75 | 0.106 | 1995 | 2325 | 43 | Adult | M | Tier 2 |
|  |  |  | -37.25 | 145.75 | 0.106 | 1995 | 2575 | 46 | Adult | M | Tier 2 |
| Serena et al., 1998 (a) | VIC | Diamond Creek | -37.91 | 145.30 | 0.497 | 1995 | 4100 | 43 | Adult | M | Tier 2 |
|  |  |  | -37.91 | 145.23 | 0.580 | 1995 | 4500 | 43 | Adult | M | Tier 2 |
|  |  |  | -37.91 | 145.30 | 0.503 | 1995 | 2500 | 22 | Adult | F | Tier 2 |
|  |  |  | -37.90 | 145.29 | 0.511 | 1995 | 3800 | 11 | Adult | M | Tier 2 |
| Serena et al., 1998 (b) | VIC | Mullum Mullum Creek | -37.74 | 145.17 | 0.554 | 1995 | 4500 | 122 | Adult | F | Tier 2 |
|  |  |  | -37.74 | 145.17 | 0.556 | 1995 | 4200 | 122 | Adult | F | Tier 2 |
|  |  |  | -37.74 | 145.17 | 0.556 | 1995 | 2900 | 122 | Adult | M | Tier 2 |
|  |  |  | -37.74 | 145.18 | 0.537 | 1995 | 3300 | 122 | Adult | M | Tier 2 |
| Serena et al., 1999 | VIC | Mullum Mullum Creek | -37.74 | 145.17 | 0.553 | 1995 | — | — | Adult | — | Tier 2 |
| Serena, 1994 | VIC | Badger Creek | -37.69 | 145.53 | 0.146 | 1990 | 330 | 19 | Adult | F | Tier 2 |
|  |  |  | -37.69 | 145.53 | 0.146 | 1990 | 540 | 58 | Adult | F | Tier 2 |
|  |  |  | -37.69 | 145.53 | 0.146 | 1990 | 720 | 85 | Adult | F | Tier 2 |
|  |  |  | -37.69 | 145.53 | 0.146 | 1990 | 840 | 18 | Adult | F | Tier 2 |
|  |  |  | -37.69 | 145.53 | 0.146 | 1990 | 1110 | 13 | Adult | F | Tier 2 |
|  |  |  | -37.69 | 145.53 | 0.146 | 1990 | 1240 | 16 | Adult | F | Tier 2 |
|  |  |  | -37.69 | 145.53 | 0.146 | 1990 | 1350 | 28 | Adult | F | Tier 2 |
|  |  |  | -37.69 | 145.53 | 0.146 | 1990 | 1570 | 41 | Adult | M | Tier 2 |
|  |  |  | -37.69 | 145.53 | 0.146 | 1990 | 1780 | 48 | Adult | M | Tier 2 |
|  |  |  | -37.69 | 145.53 | 0.146 | 1990 | 1920 | 49 | Adult | F | Tier 2 |
|  |  |  | -37.69 | 145.53 | 0.146 | 1990 | 2280 | 58 | Adult | M | Tier 2 |
| Young, 2024 | QLD | Moggill Creek | -27.50 | 152.92 | 0.555 | 2020 | 625 | 28 | Adult | F | Tier 1 |
|  |  |  | -27.50 | 152.92 | 0.555 | 2020 | 2240 | 26 | Adult | M | Tier 1 |
|  |  |  | -27.50 | 152.92 | 0.555 | 2020 | 2420 | 31 | Adult | M | Tier 1 |
|  |  |  | -27.49 | 152.89 | 0.517 | 2020 | 1400 | 25 | Adult | F | Tier 1 |
|  |  |  | -27.49 | 152.89 | 0.517 | 2020 | 1480 | 30 | Adult | F | Tier 1 |
|  |  |  | -27.49 | 152.89 | 0.517 | 2020 | 2140 | 28 | Adult | M | Tier 1 |

## Appendix 5: Reference, location, Global Human Modification index (gHM, 25 km buffer), net type, and catch per hour (CPH) for platypus trapping studies used in the cross-study synthesis

| Reference | State | River | Lat | Lon | Net Type | gHM (25 km) | gHM Epoch | CPH | **Coord source** |
| --- | --- | --- | --- | --- | --- | --- | --- | --- | --- |
| Bethge 2002 | TAS | Lake Lea | -41.52 | 145.92 | Fyke | 0.022 | 2000 | 0.015 | Tier 1 |
|  |  | Lake Lea | -41.52 | 145.92 | Mesh | 0.022 | 2000 | 0.13 | Tier 1 |
| Bethge et al. 2001 | TAS | Plenty River | -42.75 | 146.97 | Fyke | 0.109 | 1995 | 0.035 | Tier 2 |
|  |  | Plenty River | -42.75 | 146.97 | Mesh | 0.109 | 1995 | 0.23 | Tier 2 |
| Bino et al. 2015 | NSW | Shoalhaven River | -35.64 | 149.61 | Mesh | 0.044 | 1995 | 0.41 | Tier 2 |
| Bino et al., 2021 | NSW | Thone | -31.53 | 152.52 | Fyke | 0.067 | 2020 | 0.02 | Tier 1 |
|  |  | Thone | -31.53 | 152.52 | Mesh | 0.067 | 2020 | 0.25 | Tier 1 |
| Boulton et al. 2022 | VIC | Coranderrk Creek | -37.68 | 145.53 | Fyke | 0.176 | 2020 | 0.046 | Tier 1 |
| Brunt et al. 2022 | Qld | Brisbane Catchment | -27.50 | 152.93 | Fyke | 0.563 | 2020 | 0.0125 | Tier 3 |
| Connolly & Obendorf 1998 | TAS | Brumbys Creek | -41.75 | 147.00 | Mesh | 0.194 | 1995 | 0.08 | Tier 2 |
|  |  | Emu River | -41.08 | 145.92 | Mesh | 0.161 | 1995 | 0.23 | Tier 2 |
|  |  | Liffey River | -41.67 | 146.91 | Mesh | 0.200 | 1995 | 0.14 | Tier 2 |
|  |  | Mersey River | -41.42 | 146.46 | Mesh | 0.132 | 1995 | 0.14 | Tier 2 |
|  |  | Weegena farm dams | -41.16 | 147.55 | Mesh | 0.085 | 1995 | 0.25 | Tier 2 |
| Connolly et al. 2016 | NSW | Murrumbidgee Catchment | -34.98 | 148.20 | Mesh | 0.232 | 2010 | 0.05 | Tier 3 |
| Grant et al. 1992 | NSW | Thredbo River | -36.44 | 148.44 | Mesh | 0.035 | 1990 | 0.12 | Tier 2 |
| Grant, T. R. unpublished | — | Nepean River | -33.99 | 150.67 | Mesh | 0.277 | 2000 | 0.15 | Tier 1 |
|  |  | Nepean River | -33.99 | 150.67 | Mesh | 0.287 | 2005 | 0.12 | Tier 1 |
|  |  | Wingecarribee River | -34.47 | 150.32 | Mesh | 0.097 | 2000 | 0.42 | Tier 1 |
|  |  | Wingecarribee River | -34.47 | 150.32 | Mesh | 0.101 | 2005 | 0.64 | Tier 1 |
| Gust & Griffiths 2011 | TAS | Tasmania | -41.62 | 146.68 | Fyke | 0.117 | 2010 | 0.02 | Tier 3 |
| Hawke et al. 2021 | NSW | Eucumbene River | -36.23 | 148.63 | Fyke | 0.064 | 2015 | 0.07 | Tier 1 |
|  |  | Mitta Mitta River DS | -36.81 | 147.66 | Fyke | 0.040 | 2015 | 0.009 | Tier 1 |
|  |  | Mitta Mitta River DS | -36.81 | 147.66 | Mesh | 0.040 | 2015 | 0.033 | Tier 1 |
|  |  | Mitta Mitta River US | -36.51 | 147.41 | Fyke | 0.039 | 2020 | 0.0119 | Tier 1 |
|  |  | Mitta Mitta River US | -36.51 | 147.41 | Mesh | 0.039 | 2020 | 0.139 | Tier 1 |
|  |  | Ovens | -36.38 | 146.36 | Fyke | 0.255 | 2015 | 0.0163 | Tier 1 |
|  |  | Ovens | -36.38 | 146.36 | Mesh | 0.255 | 2015 | 0.156 | Tier 1 |
|  |  | Severn River DS | -29.50 | 151.57 | Fyke | 0.086 | 2015 | 0.0278 | Tier 1 |
|  |  | Severn River DS | -29.50 | 151.57 | Mesh | 0.086 | 2015 | 0.177 | Tier 1 |
|  |  | Severn River US | -29.29 | 151.12 | Mesh | 0.090 | 2015 | 0.284 | Tier 1 |
|  |  | Tenterfield | -29.03 | 151.76 | Fyke | 0.050 | 2015 | 0.072 | Tier 1 |
|  |  | Tenterfield | -29.03 | 151.76 | Mesh | 0.050 | 2015 | 0.222 | Tier 1 |
|  |  | Thredbo River | -36.42 | 148.47 | Fyke | 0.042 | 2015 | 0.01 | Tier 1 |
|  |  | Thredbo River | -36.42 | 148.47 | Mesh | 0.042 | 2015 | 0.208 | Tier 1 |
| Hawke et al. 2021, Crane 2022, PCI | NSW | Snowy River | -36.45 | 148.64 | Mesh | 0.079 | 2020 | 0.284 | Tier 1 |
| Kangaroo Island | SA | Rocky River | -35.95 | 136.69 | Fyke | 0.044 | 2020 | 0.038 | Tier 2 |
| Khurana et al., 2024, PCI | NSW/QLD | Gwydir | -29.99 | 150.80 | Mesh | 0.082 | 2020 | 0.056 | Tier 1 |
|  |  | Peel | -31.31 | 151.14 | Mesh | 0.113 | 2020 | 0.13 | Tier 1 |
|  |  | Pike Creek | -28.99 | 151.50 | Mesh | 0.064 | 2020 | 0.07 | Tier 1 |
|  |  | Severn | -29.48 | 151.42 | Mesh | 0.081 | 2020 | 0.203 | Tier 1 |
| Lunney et al. 2004 | — | Bellinger River | -30.42 | 152.78 | Mesh | 0.056 | 1995 | 0.22 | Tier 2 |
|  |  | Kalang River | -30.47 | 152.87 | Mesh | 0.082 | 1995 | 0.23 | Tier 2 |
| McLachlan-Troup 2007 | NSW | Kangaroo River and Brogers Creek | -34.72 | 150.57 | Mesh | 0.125 | 2000 | 0.3 | Tier 2 |
| Melbourne Water | VIC | Dandenong | -37.91 | 145.34 | Fyke | 0.503 | 2010 | 0.032 | Tier 2 |
|  |  | Maribyrnong | -37.59 | 144.76 | Fyke | 0.382 | 2010 | 0.053 | Tier 2 |
|  |  | Werribee | -37.86 | 144.60 | Fyke | 0.417 | 2010 | 0.013 | Tier 2 |
|  |  | Westernport | -38.06 | 145.81 | Fyke | 0.156 | 2010 | 0.053 | Tier 2 |
|  |  | Yarra Lower | -37.77 | 145.25 | Fyke | 0.533 | 2010 | 0.036 | Tier 2 |
|  |  | Yarra Upper | -37.73 | 145.61 | Fyke | 0.130 | 2010 | 0.046 | Tier 2 |
| Serena & Williams 2008 | — | Aberfeldy River/Donnelly Creek | -37.78 | 146.40 | Fyke | 0.030 | 2010 | 0.021 | Tier 2 |
|  |  | Mount Skene Creek/Barkly River | -37.47 | 146.46 | Fyke | 0.011 | 2010 | 0.1 | Tier 2 |
|  |  | Valencia Creek | -37.74 | 146.99 | Fyke | 0.060 | 2010 | 0.04 | Tier 2 |
|  |  | Wentworth River/Pheasant Creek | -37.42 | 147.42 | Fyke | 0.011 | 2010 | 0.02 | Tier 2 |
| Serena 1994 | VIC | Badger Creek | -37.68 | 145.53 | Fyke | 0.143 | 1990 | 0.03 | Tier 2 |
| Serena et al. 1998 | VIC | Diamond Creek | -37.71 | 145.15 | Fyke | 0.534 | 1995 | 0.02 | Tier 2 |
|  |  | Mullum Mullum Creek | -37.77 | 145.19 | Fyke | 0.571 | 1995 | 0.02 | Tier 2 |
| Williams & Serena 2000 | VIC | Coliban River | -37.19 | 144.38 | Fyke | 0.195 | 2000 | 0.42 | Tier 2 |
| Williams & Serena 2002 | VIC | Loddon River | -37.18 | 144.22 | Fyke | 0.186 | 2000 | 0.03 | Tier 2 |
| Williams 2004 | VIC | Mount Emu Creek | -33.99 | 142.67 | Fyke | 0.069 | 2005 | 0.14 | Tier 2 |
| Young (this study) | Qld | Gold Creek | -27.49 | 152.90 | Fyke | 0.533 | 2020 | 0 | Tier 1 |
|  |  | Moggill Creek DS | -27.49 | 152.91 | Fyke | 0.547 | 2020 | 0.0138 | Tier 1 |
|  |  | Moggill Creek DS | -27.49 | 152.91 | Mesh | 0.547 | 2020 | 0.083 | Tier 1 |
|  |  | Moggill Creek US | -27.49 | 152.91 | Fyke | 0.547 | 2020 | 0.042 | Tier 1 |
|  |  | Moggill Creek US | -27.49 | 152.91 | Mesh | 0.547 | 2020 | 0.031 | Tier 1 |

## Appendix 6: Simper invertebrate order contribution comparison

| Comparison | Order | Average Contribution | Cumulative Contribution | P |
| --- | --- | --- | --- | --- |
| Moggill DS vs Gold Creek | Amphipoda | 0.0344 | 0.0849 | 0.0105 |
| Hemiptera | 0.027 | 0.1514 | 0.2445 |
| Lepidoptera | 0.0249 | 0.2127 | 0.6778 |
| Coleoptera | 0.0243 | 0.2725 | 0.356 |
| Megaloptera | 0.0243 | 0.3324 | 0.0491 |
| Anthoathecata | 0.0218 | 0.386 | 0.0165 |
| Odonata | 0.0209 | 0.4376 | 0.0143 |
| Ephemeroptera | 0.0185 | 0.4832 | 0.9961 |
| Monostilifera | 0.0181 | 0.5278 | 0.6518 |
| Littorinimorpha | 0.0166 | 0.5688 | 0.3265 |
| Hymenoptera | 0.0163 | 0.609 | 0.2975 |
| Calanoida | 0.0152 | 0.6464 | 0.0053 |
| Lumbriculida | 0.0146 | 0.6823 | 0.9959 |
| Araneae | 0.0145 | 0.718 | 0.6197 |
| Cyclopoida | 0.0119 | 0.7474 | 0.0104 |
| Decapoda | 0.0119 | 0.7767 | 0.6288 |
| Heteronemertea | 0.0098 | 0.8008 | 0.3558 |
| Poduromorpha | 0.0097 | 0.8248 | 0.9654 |
| Neuroptera | 0.0092 | 0.8475 | 0.9285 |
| Psocoptera | 0.0088 | 0.8691 | 0.7479 |
| Sarcoptiformes | 0.0088 | 0.8907 | 0.4065 |
| Crassiclitellata | 0.0074 | 0.9089 | 0.0263 |
| Diplostraca | 0.0058 | 0.9232 | 1 |
| Rhizostomeae | 0.0055 | 0.9368 | 0.5338 |
| Tricladida | 0.0054 | 0.9501 | 0.0369 |
| Unionida | 0.0054 | 0.9635 | 0.0369 |
| Limnomedusae | 0.0049 | 0.9757 | 0.9977 |
| Phyllodocida | 0.0049 | 0.9878 | 0.5666 |
| Trichoptera | 0.0049 | 1 | 0.5666 |
| Diptera | 0 | 1 | 0.9124 |
| Entomobryomorpha | 0 | 1 | 0.6868 |
| Tubificida | 0 | 1 | 0.0001 |
| Diplostraca | 0.0419 | 0.0897 | 0.0002 |
| Lumbriculida | 0.0308 | 0.1558 | 0.0233 |
| Gold_Creek vs Moggill US | Limnomedusae | 0.0295 | 0.2191 | 0.0042 |
| Ephemeroptera | 0.0288 | 0.2808 | 0.0633 |
| Hemiptera | 0.0247 | 0.3338 | 0.6936 |
| Lepidoptera | 0.0245 | 0.3864 | 0.7377 |
| Coleoptera | 0.0238 | 0.4374 | 0.4749 |
| Megaloptera | 0.0227 | 0.486 | 0.1851 |
| Poduromorpha | 0.0218 | 0.5327 | 0.0987 |
| Monostilifera | 0.0212 | 0.5781 | 0.2438 |
| Anthoathecata | 0.0188 | 0.6183 | 0.1801 |
| Odonata | 0.018 | 0.6568 | 0.1762 |
| Amphipoda | 0.0177 | 0.6947 | 0.999 |
| Araneae | 0.0166 | 0.7302 | 0.4056 |
| Decapoda | 0.0166 | 0.7657 | 0.1603 |
| Neuroptera | 0.0162 | 0.8005 | 0.4022 |
| Diptera | 0.0144 | 0.8314 | 0.0889 |
| Calanoida | 0.0137 | 0.8609 | 0.1312 |
| Littorinimorpha | 0.0136 | 0.89 | 0.7146 |
| Hymenoptera | 0.0131 | 0.9181 | 0.7239 |
| Cyclopoida | 0.0109 | 0.9416 | 0.1441 |
| Crassiclitellata | 0.0067 | 0.9559 | 0.4926 |
| Psocoptera | 0.0056 | 0.9679 | 0.8514 |
| Tricladida | 0.005 | 0.9787 | 0.553 |
| Unionida | 0.005 | 0.9894 | 0.553 |
| Entomobryomorpha | 0.0049 | 1 | 0.4555 |
| Heteronemertea | 0 | 1 | 0.8585 |
| Phyllodocida | 0 | 1 | 0.617 |
| Rhizostomeae | 0 | 1 | 0.6213 |
| Sarcoptiformes | 0 | 1 | 0.8633 |
| Trichoptera | 0 | 1 | 0.617 |
| Tubificida | 0 | 1 | 0.0001 |
| Amphipoda | 0.0454 | 0.0954 | 0.0002 |
| Diplostraca | 0.0403 | 0.1802 | 0.0001 |
| Ephemeroptera | 0.0385 | 0.261 | 0.0014 |
| Lumbriculida | 0.0366 | 0.338 | 0.0017 |
| Moggill DS_vs Moggill US | Limnomedusae | 0.0303 | 0.4017 | 0.0028 |
| Coleoptera | 0.0284 | 0.4613 | 0.0442 |
| Lepidoptera | 0.0277 | 0.5194 | 0.1651 |
| Hemiptera | 0.0246 | 0.5711 | 0.7607 |
| Poduromorpha | 0.023 | 0.6194 | 0.041 |
| Neuroptera | 0.02 | 0.6615 | 0.0411 |
| Monostilifera | 0.0192 | 0.7018 | 0.4589 |
| Diptera | 0.0156 | 0.7345 | 0.0035 |
| Araneae | 0.0149 | 0.7658 | 0.5915 |
| Megaloptera | 0.014 | 0.7953 | 0.9282 |
| Littorinimorpha | 0.013 | 0.8225 | 0.7502 |
| Psocoptera | 0.0125 | 0.8487 | 0.2366 |
| Hymenoptera | 0.0125 | 0.8749 | 0.7708 |
| Decapoda | 0.0111 | 0.8983 | 0.6688 |
| Heteronemertea | 0.0095 | 0.9183 | 0.4381 |
| Sarcoptiformes | 0.0086 | 0.9363 | 0.4425 |
| Anthoathecata | 0.0053 | 0.9476 | 0.9765 |
| Rhizostomeae | 0.0053 | 0.9588 | 0.6222 |
| Entomobryomorpha | 0.0052 | 0.9697 | 0.035 |
| Odonata | 0.0048 | 0.9798 | 0.9776 |
| Phyllodocida | 0.0048 | 0.9899 | 0.6286 |
| Trichoptera | 0.0048 | 1 | 0.6286 |
| Calanoida | 0 | 1 | 0.9097 |
| Crassiclitellata | 0 | 1 | 0.6822 |
| Cyclopoida | 0 | 1 | 0.9125 |
| Tricladida | 0 | 1 | 0.685 |
| Tubificida | 0 | 1 | 0.0001 |
| Unionida | 0 | 1 | 0.685 |
| Amphipoda | 0.0344 | 0.0849 | 0.0105 |
| Hemiptera | 0.027 | 0.1514 | 0.2445 |
| Lepidoptera | 0.0249 | 0.2127 | 0.6778 |
| Coleoptera | 0.0243 | 0.2725 | 0.356 |
| Megaloptera | 0.0243 | 0.3324 | 0.0491 |
| Anthoathecata | 0.0218 | 0.386 | 0.0165 |
